# Supplementary material for: An anion exchange strategy for construction of a novel Bi2SiO5/Bi2MoO6 heterostructure with enhanced photocatalytic performance
Source: Royal Society of Chemistry journal article supplement (doi:10.1039/c8cy00409a), 2018-01-01
Supplement: c8cy00409a1.pdf [file c8cy00409a1.pdf]

## Anion exchange strategy for construction of a novel $\text{Bi}_2\text{SiO}_5/\text{Bi}_2\text{MoO}_6$ heterostructure with enhanced photocatalytic performance

Di Liu,<sup>a</sup> Jun Wang,<sup>b</sup> Yonggang Wang<sup>\*a</sup> and Yongfa Zhu<sup>\*b</sup>

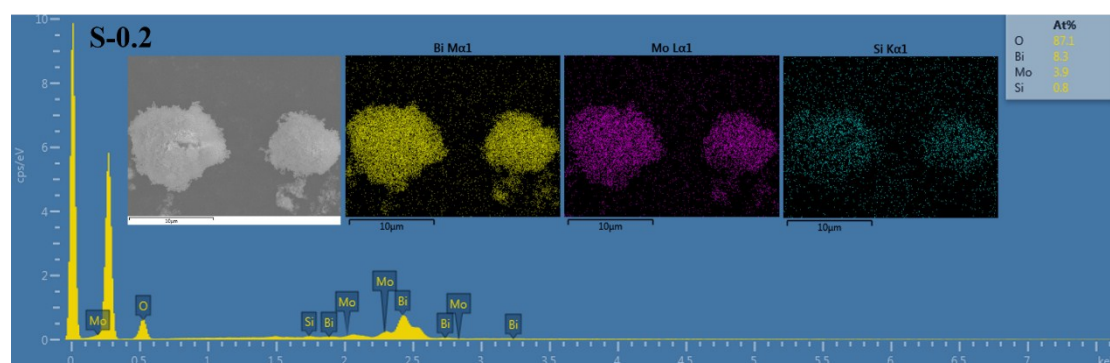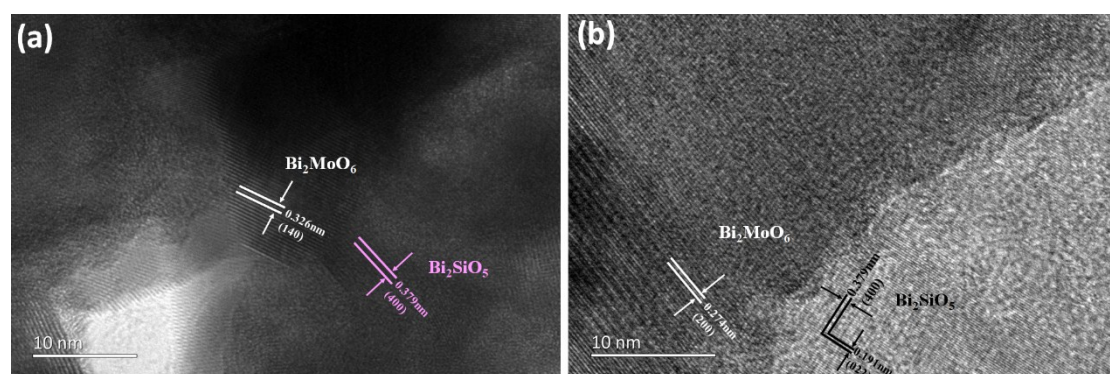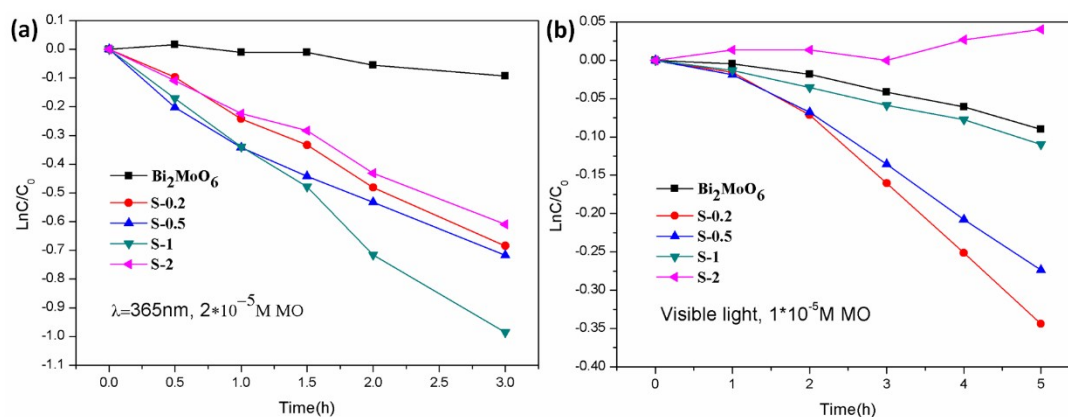

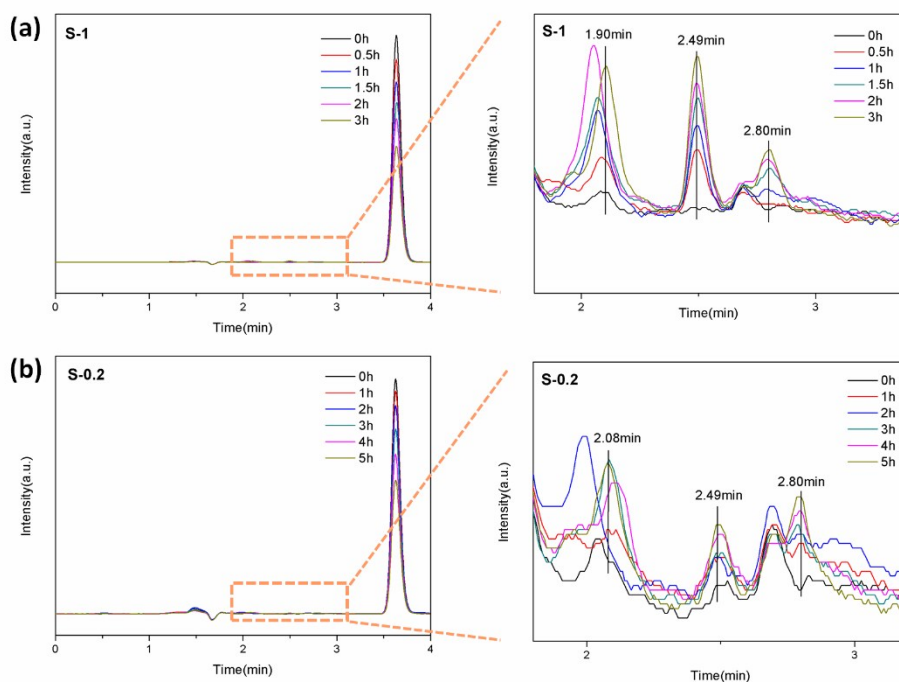

**Fig. S4** HPLC chromatograms monitoring the photo-degradation process of phenol at interval times by S-1 (a) under UV light irradiation and S-0.2 (b) under visible light irradiation.

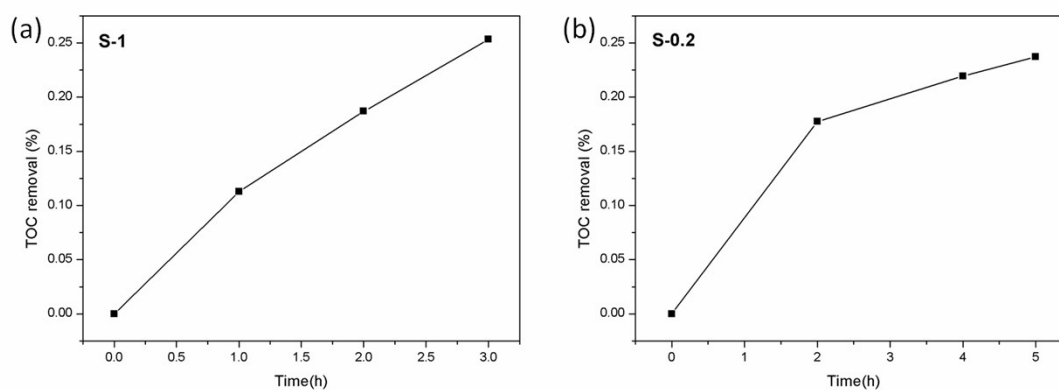

**Fig. S5** TOC removal rate over phenol by S-1 (a) under UV light irradiation and S-0.2 (b) under visible light irradiation.

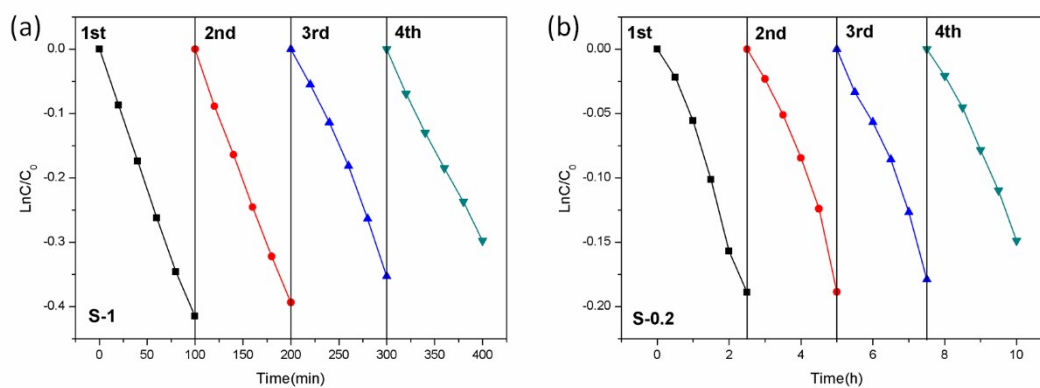

**Fig. S6** Cycling runs in the photocatalytic degradation of phenol in the presence of S-1 (a) under UV light irradiation and S-0.2 (b) under visible light irradiation.

UV light irradiation and S-0.2 (b) under visible light irradiation.

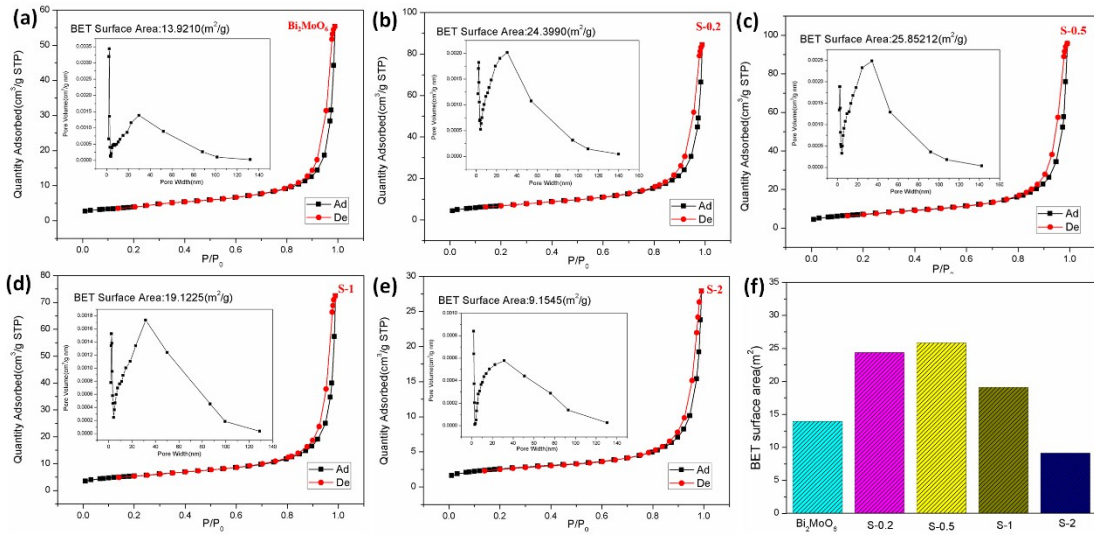

**Fig. S7**  $N_2$  adsorption-desorption isotherms, pore size distribution and BET specific surface areas of the as-prepared samples.

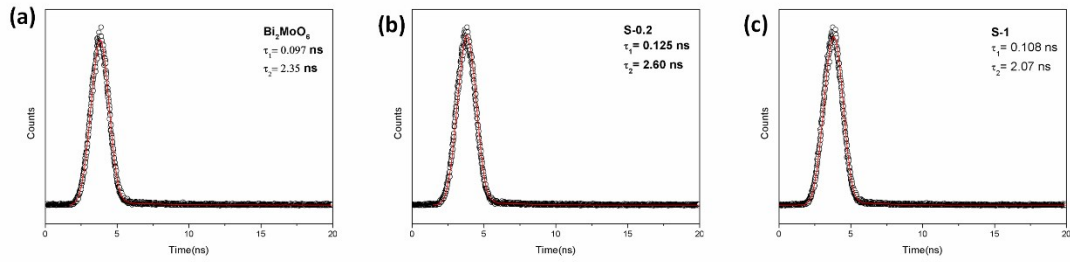

**Fig. S8** Time-resolved PL decay curves and lifetimes of sample  $Bi_2MoO_6$  (a), S-0.2 (b) and S-1 (c) monitored at 397 nm with an excitation wavelength of 335 nm under room-temperature.

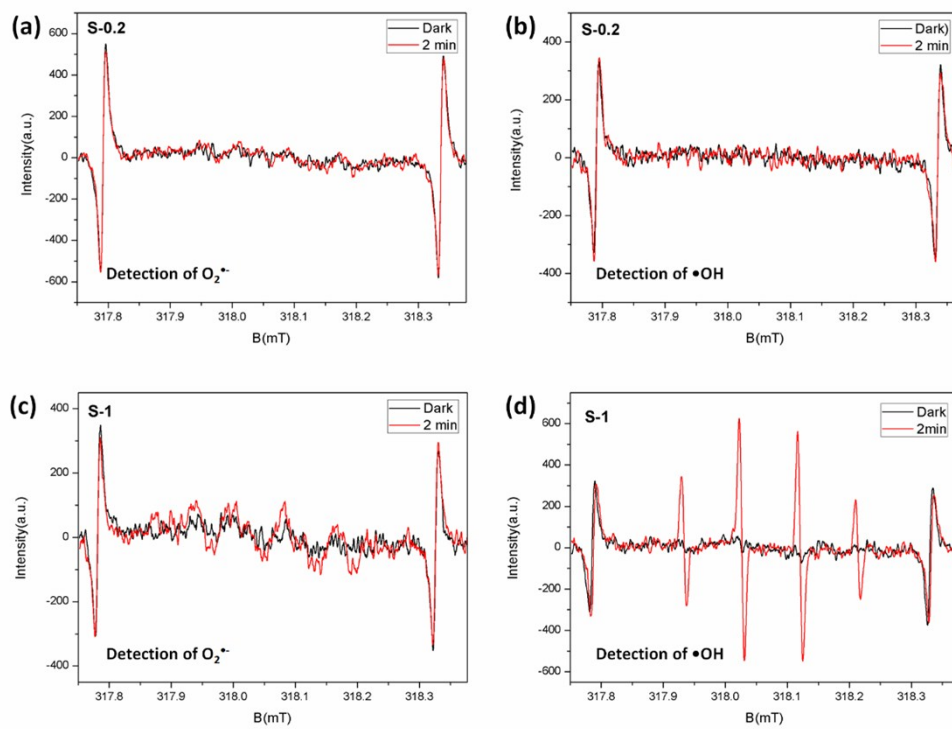

**Fig. S9** ESR spectra upon visible light irradiation of S-0.2 suspension and UV light irradiation of S-1 suspension for detection of  $\bullet OH$  and  $O_2^{\bullet-}$ .
